# Supplementary material for: The Combination of G-CSF/AMD3100 Mobilizes Bone Marrow-Derived Stem Cells to Rescue Mice from Cisplatin-Induced Acute Kidney Injury
Source: Research Square preprint supplement (doi:10.21203/rs.3.rs-152800/v1), 2021-01-28
Supplement: Supplementary file 1 [file 16478acc8bdcaeb25e7bb4a4.docx]

**The Combination of G-CSF/AMD3100 Mobilizes Bone Marrow-derived Stem Cells to Rescue Mice from Cisplatin-induced Acute Kidney Injury**

**Supplementary figure 1**


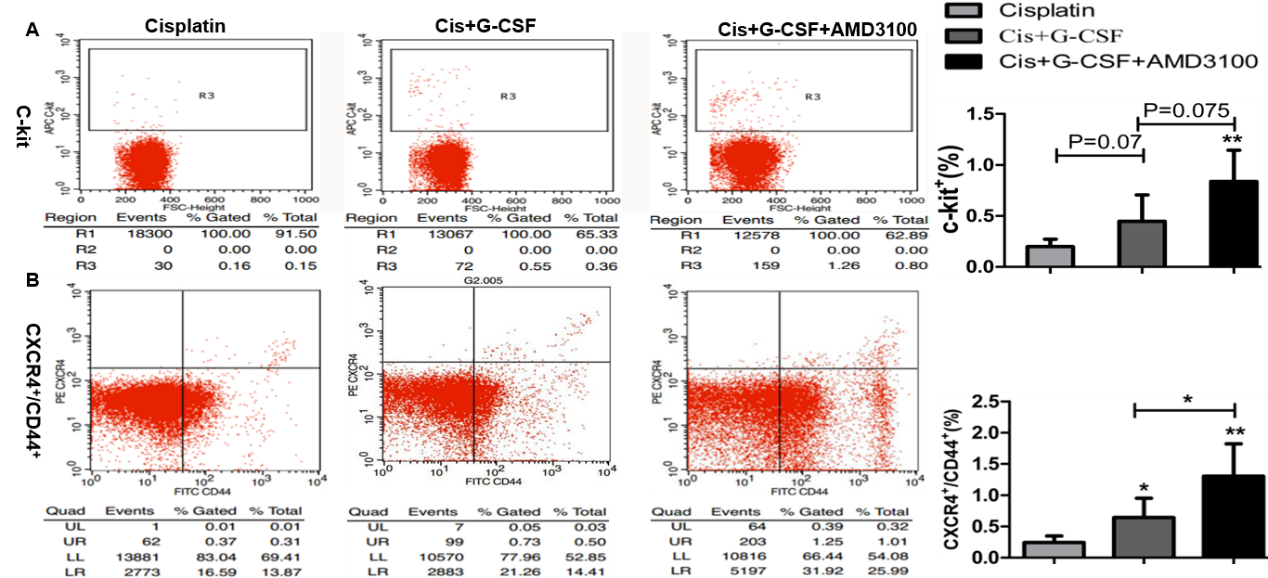


Supplemental Figure 1. Effects of G-CSF and/or AMD3100 on mobilization of stem cells. The percentage of c-kit+ cells (A) and CXCR4+/CD44+ cells in the circulating blood was performed flow cytometry analysis after induction of AKI in control cisplatin, G-CSF and G-CSF/AMD treated mice. Results are expressed as the means ± SD (*n=*5 per group),*P<0.05, **P<0.01, vs. the cisplatin group, and the indicated test group.

**Supplementary figure 2**

**
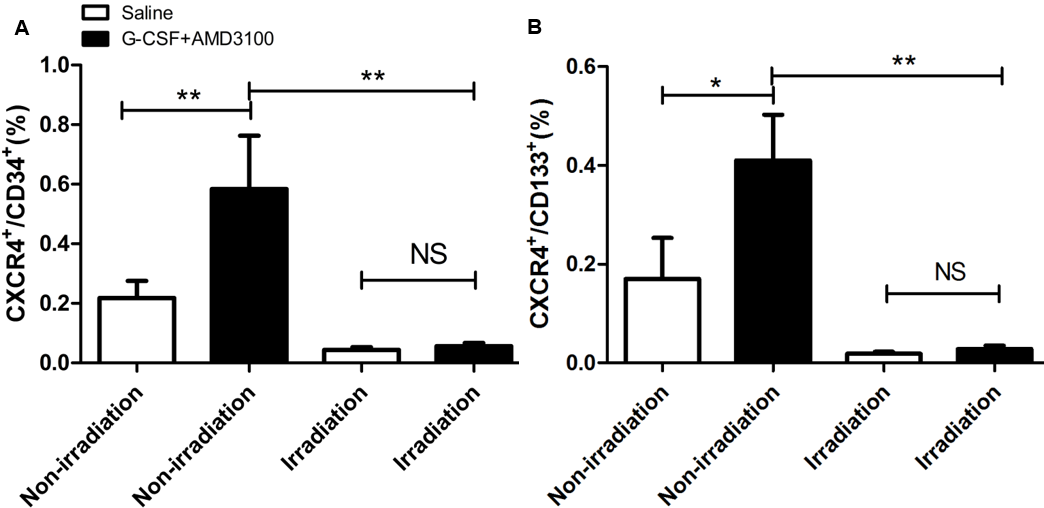
**

Supplemental Figure 2 Effect of bone marrow ablation (BMA) and G-CSF/AMD3100 treatment in C57BL/6J mice on mobilization of stem cells in the peripheral blood. Irradiated C57BL/6J mice received treatment with G-CSF/AMD3100 or saline, as described in the Materials and Methods section. 96 hours after the last injection of cytokines, collected of peripheral blood. The percentage of CXCR4+CD34+ cells (A), CXCR4+CD133+ cells (B) in the circulating blood was performed flow cytometry analysis. Results are expressed as the means ± SD (*n=*5 per group),*P<0.05, **P<0.01, NS : no significance.

**Supplementary figure 3**


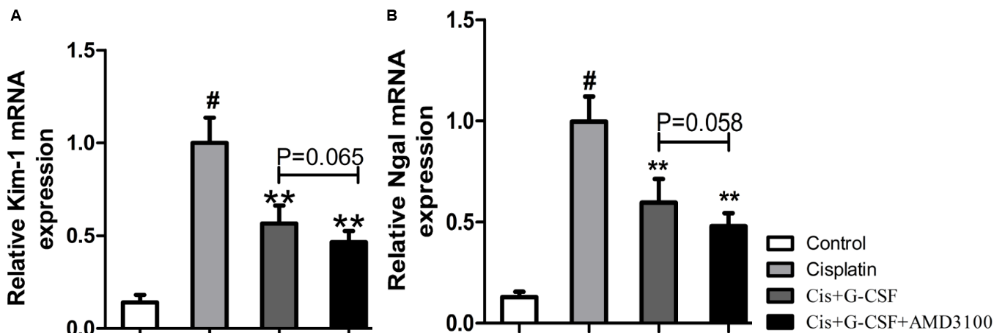


Supplemental figure 3 Effects of G-CSF/AMD3100 on the Kim-1, Ngal mRNA expression. (A)The expression of Kim-1 mRNA was detected by RT-PCR. (B) The expression of Ngal mRNA was detected by RT-PCR. Results are expressed as the means ± SD (*n=*6), # P<0.001, vs. the control group; **P<0.01, vs. the cisplatin group and the indicated test group.

**Supplementary figure 4**


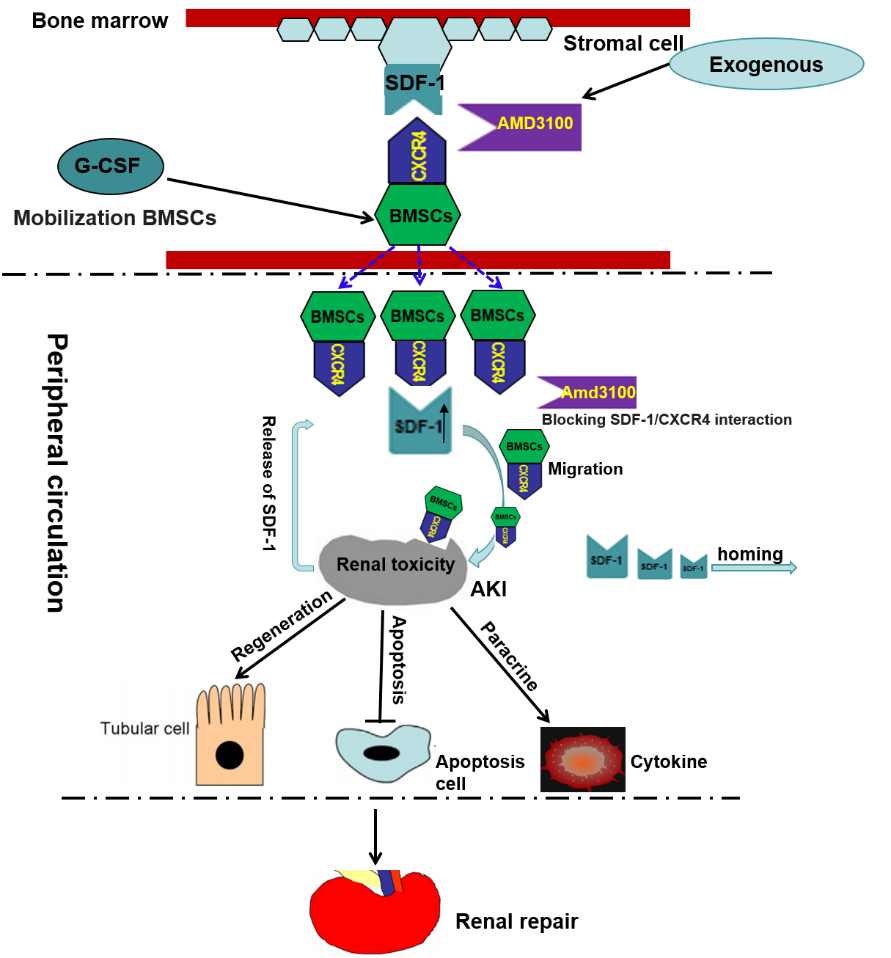


Supplemental figure 4 Schematic diagrams illustrating the mechanism of G-CSF/AMD3100 mobilizing bone marrow–derived stem cells rescues mice from Cisplatin-induced acute renal failure. Exogenous AMD3100 specifically blocks CXCR4 mediated SDF-1/CXCR4 interactions in bone marrow microenvironment, resulting in BMSCs snap out the bone marrow niche, mobilize to the peripheral blood, and homing into injured kidney. The BMSCs promote renal repair via improving renal tubular cells proliferation and regeneration, regulating apoptosis and inflammatory cytokines.
